# Supplementary material for: Health impacts from living near a major industrial park in Oman
Source: Springer Nature journal article supplement (doi:10.1186/s12889-015-1866-3), 2015-06-01
Supplement: MOESM1 [file 9749554]

**Additional file1. Example of international housing policies for the minimum acceptable distance from industry to residential areas.**

| Industry type            | MAD       | Government body           | Country     | Reference |
|--------------------------|-----------|---------------------------|-------------|-----------|
| Petrochemical industries | >2 km     | EPA Victoria              | Australia   | [1]       |
| Metal production         | >1-2 km   |                           |             |           |
| Aluminum production      | >1.5-2 km | EPA Western Australia     | Australia   | [2]       |
| Petroleum refining       | >2 km     | EPA South Australia       | Australia   | [3]       |
| Petroleum refining       | >2 km     |                           |             |           |
| Aluminum by electrolysis | >2 km     |                           |             |           |
| Petroleum refining       | >2 km     | Auckland council          | New Zealand | [4]       |
| Metal processing         | >1km      | Department of Environment | Malaysia    | [5]       |

MAD: minimum acceptable distance

EPA: Environmental Protection Authority

1. EPA Victoria: *Recommended Separation Distances for Industrial Residual Air Emissions*. March. Victoria; 2013:1–17.
2. Segui C: *Guidance for the Assessment of Environmental Factors*. Western Australia; 2005:1–59.
3. Torr P, Watson D: *Guidelines for Separation Distances*. South Australia; 2005(consultation draft):1–23.
4. Wickham L: *Separation Distances for Industry*. 2012:1–44.
5. *Guidelines for the Siting and Zoning of Industry and Residential Areas*. 2nd edition. Malaysia; 2013:1–134.
