# Supplementary material for: Health impacts from living near a major industrial park in Oman
Source: Springer Nature journal article supplement (doi:10.1186/s12889-015-1866-3), 2015-06-01
Supplement: MOESM2 [file 9749554]

**Additional Table 1. Multivariate Analysis<sup>a</sup> of Asthma and conjunctivitis incidence<sup>b</sup>. Results are stratified by age category and gender.**

| <u>Stratification</u> | <u>Combined<sup>c</sup><br/>RR (95% CI)</u> |
|-----------------------|---------------------------------------------|
| <b>Asthma</b>         |                                             |
| Overall               | 3.87 (3.14-4.77)                            |
| Males                 | 4.86 (3.61-6.55)                            |
| Females               | 3.00 (2.35-3.83)                            |
| ≥20-49 years          | 2.25 (1.75-2.90)                            |
| ≥50 years             | 3.86 (3.03-4.66)                            |
| <b>Conjunctivitis</b> |                                             |
| Overall               | 2.90 (2.51-3.35)                            |
| Males                 | 3.06 (2.45-3.84)                            |
| Females               | 2.65 (2.22-3.18)                            |
| ≥20-49 years          | 2.26 (1.96-2.61)                            |
| ≥50 years             | 2.93 (2.34-3.18)                            |

<sup>a</sup> Adjusted for time trend.

<sup>b</sup> Age and gender standardized according to census population figures for 2010.

<sup>c</sup> Including high and intermediate exposure zones, control exposure zone as reference.

RR risk ratio; CI confidence interval.
